# Supplementary material for: Selective diameter uptake of single-walled carbon nanotubes in water using phosphonated calixarenes and ‘extended arm’ sulfonated calixarenes
Source: Royal Society of Chemistry journal article supplement (doi:10.1039/b814904f), 2008-01-01
Supplement: b814904f.pdf [file b814904f.pdf]

Supplementary material (ESI) for Journal of Materials Chemistry  
This journal is © The Royal Society of Chemistry 2008

## **Selective diameter uptake of single-walled carbon nanotubes in water using phosphonated calixarenes and ‘extended arm’ sulfonated calixarenes**

### **Supporting Information**

**Lee J. Hubble,<sup>a,b</sup> Thomas E. Clark,<sup>a</sup> Mohamed Makha,<sup>a</sup> and Colin L. Raston<sup>\*a</sup>**

<sup>a</sup> Centre for Strategic Nano-Fabrication, School of Biomedical, Biomolecular and Chemical Sciences, The University of Western Australia, 35 Stirling Highway, Crawley, WA, 6009, Australia. Fax: (+61) 8-6488-8683; Tel: (+61) 8-6488-1572; Email: [clraston@chem.uwa.edu.au](mailto:clraston@chem.uwa.edu.au)

<sup>b</sup> Centre for Forensic Science, The University of Western Australia, 35 Stirling Highway, Crawley, WA, 6009, Australia.

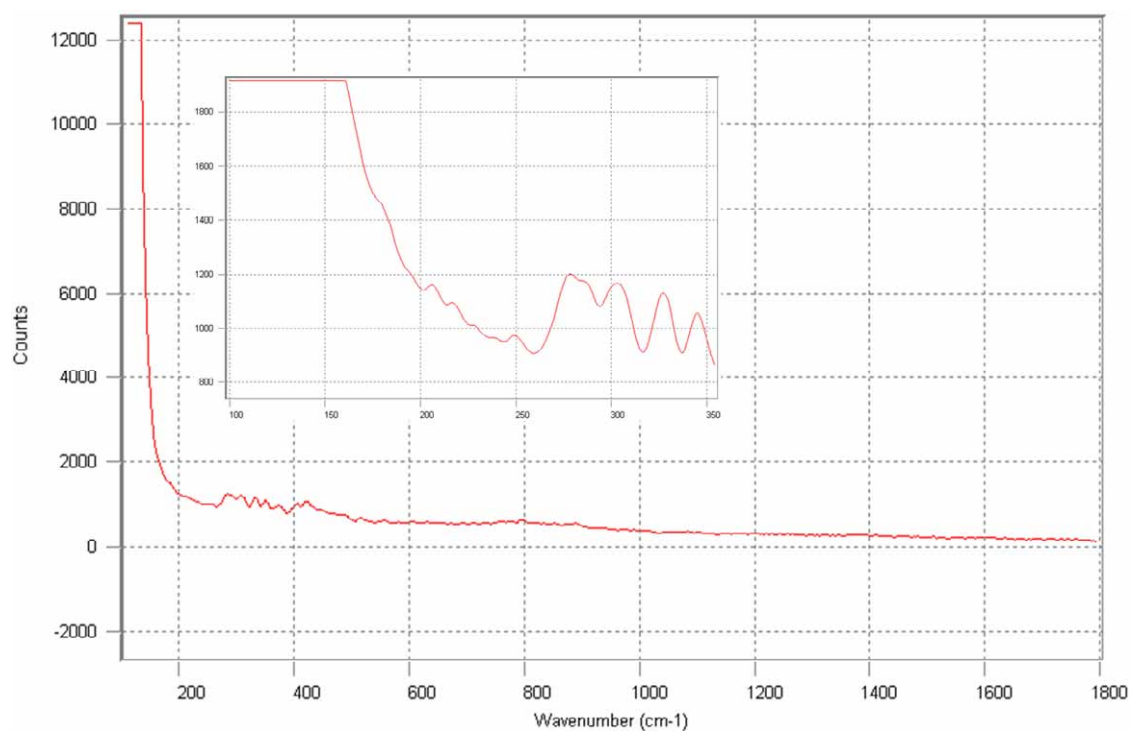

**Supplementary Figure 1.** Raman spectrum of the 'blank' aluminium foil, inset of the typical radial breathing mode frequency range. These 'baseline' frequencies were taken into account for the analysis of the as-received SWCNTs and supernatant residues. This also represents the spectrum obtained when analysing calixarene control samples.

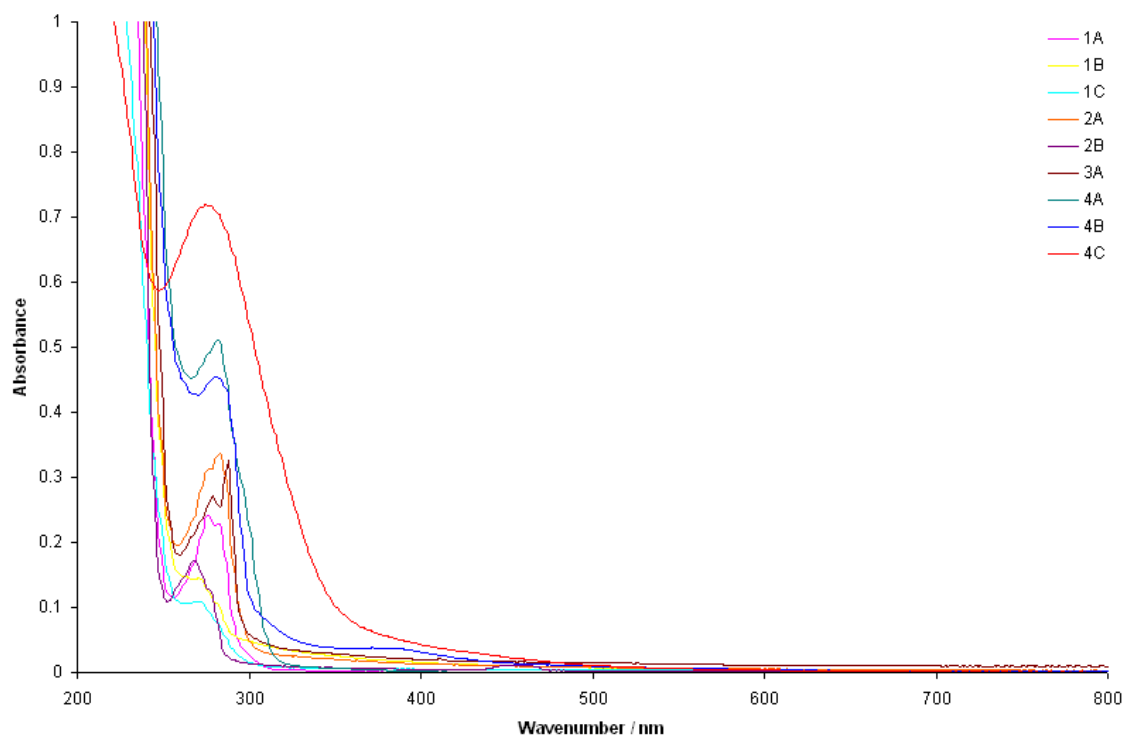

**Supplementary Figure 2a.** UV-visible spectra of the *p*-phosphonated calixarenes (**1A-3A**) and *p*-sulfonated calixarenes (**4A-4C**).

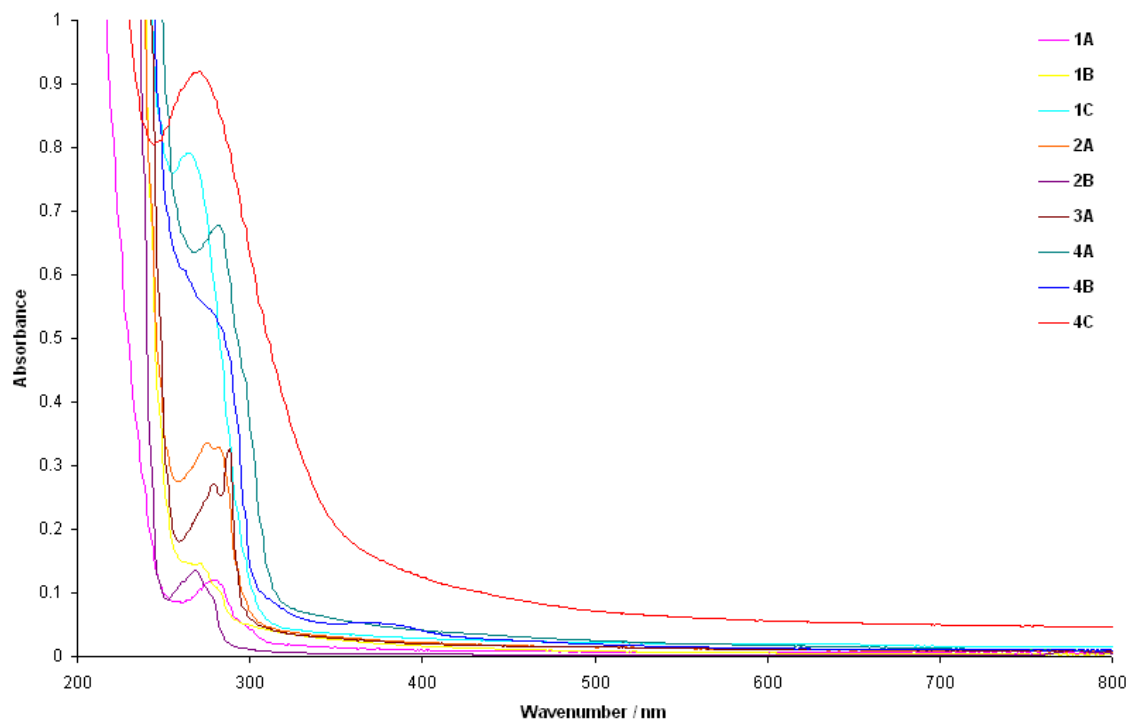

**Supplementary Figure 2b.** UV-visible spectra of the *p*-phosphonated calixarenes (**1A-3A**)/ SWNT supernatants and *p*-sulfonated calixarenes (**4A-4C**) / SWCNT supernatants.
